# Supplementary material
Source: PubMed Central journal article supplement (PMC6597353)
Supplement: EMS83293-supplement-Supplementary_material.pdf [file EMS83293-supplement-Supplementary_material.pdf]

475 **Supplementary material**

476

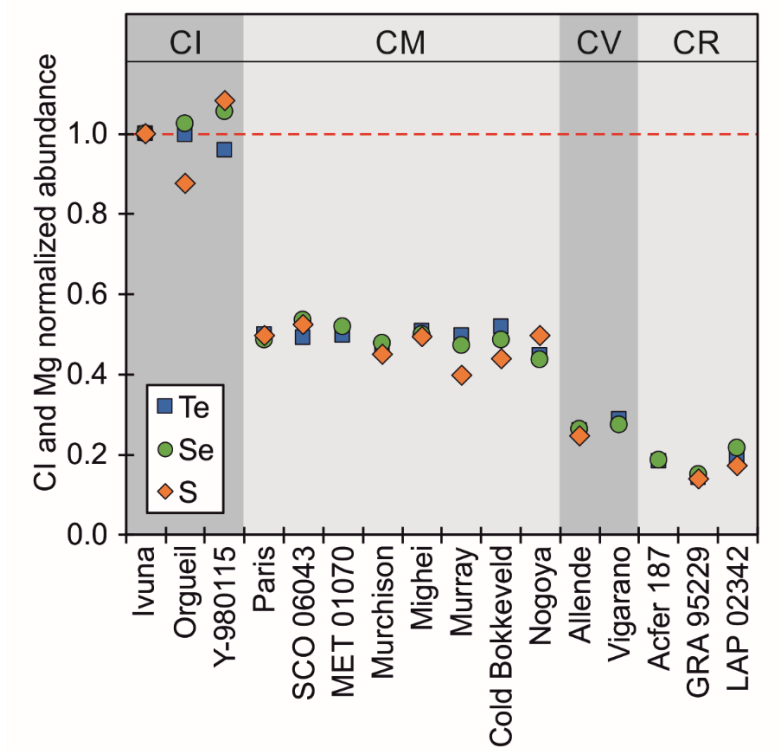

477

478 **Supplementary Figure 1: Sulfur, Se and Te abundances in carbonaceous chondrites relative to CI (Ivuna) and**  
479 **Mg normalized.**

480

481

482 **Supplementary Table 1: Average volatile element abundances in carbonaceous chondrites and the BSE.**

|    | <b>CI</b> | <b>%RSD</b> | Source     | <b>CM</b> | <b>CV</b> | <b>CR</b> | Source     | <b>BSE</b> | <b>%RSD</b> | Source |
|----|-----------|-------------|------------|-----------|-----------|-----------|------------|------------|-------------|--------|
| Mg | 96700     | 2.8         | (25)       | 121000    | 141000    | 124000    | (25)       | 221700     | 1           | (1)    |
| Fe | 193000    | 2.9         | (25)       | 220000    | 231000    | 240000    | (25)       | 63000      | 1           | (1)    |
| Pd | 0.560     | 4.0         | (27)       | 0.630     | 0.710     | 0.690     | (61)       | 0.00710    | 20          | (1)    |
| Si | 107000    | 3.0         | (27)       | 127000    | 157000    | 150000    | (61)       | 212000     | 1           | (1)    |
| Cr | 2720      | 3.6         | (25)       | 3170      | 3480      | 3860      | (25)       | 2520       | 10          | (1)    |
| P  | 905       | 2.3         | (25)       | 982       | 1040      | 903       | (25)       | 87.0       | 15          | (1)    |
| Mn | 2040      | 4.0         | (25)       | 1770      | 14004     | 1830      | (25)       | 1050       | 10          | (1)    |
| Li | 1.45      | 10          | (27)       | 1.50      | 1.70      | -         | (61)       | 1.60       | 20          | (1)    |
| As | 1.83      | 4.4         | (25)       | 1.81      | 1.63      | 1.39      | (25)       | 0.0680     | 30          | (1)    |
| Cu | 146       | 2.6         | (25)       | 140       | 107       | 91.3      | (25)       | 30.0       | 20          | (62)   |
| K  | 410       | 6.2         | (25)       | 384       | 266       | 261       | (25)       | 260        | 15          | (1)    |
| Sb | 0.135     | 14          | (27)       | 0.130     | 0.0850    | 0.0800    | (61)       | 0.00540    | 40          | (1)    |
| Ga | 9.25      | 5.5         | (25)       | 6.81      | 5.18      | 3.54      | (25)       | 4.40       | 5           | (1)    |
| Na | 4930      | 5.9         | (25)       | 3900      | 2680      | 2290      | (25)       | 2590       | 5           | (1)    |
| Ge | 32.6      | 9.0         | (27)       | 26.0      | 16.0      | 18.0      | (61)       | 1.20       | 20          | (1)    |
| Rb | 2.09      | 2.0         | (25)       | 1.58      | 1.15      | 1.04      | (25)       | 0.605      | 10          | (1)    |
| Cs | 0.173     | 1.6         | (25)       | 0.118     | 0.0804    | 0.0585    | (25)       | 0.0180     | 50          | (1)    |
| Bi | 0.110     | 7.0         | (27)       | 0.0700    | 0.0500    | -         | (61)       | 0.00300    | 50          | (1)    |
| Ag | 0.220     | 2.5         | (25)       | 0.133     | 0.0899    | 0.0400    | (25)       | 0.00900    | 33          | (62)   |
| Pb | 2.62      | 2.2         | (25)       | 1.50      | 1.07      | 0.466     | (25)       | 0.185      | 10          | (1)    |
| Zn | 337       | 3.8         | (25)       | 196       | 123       | 61.4      | (25)       | 54.0       | 9           | (1)    |
| Te | 2.29      | 1.2         | this study | 1.42      | 0.890     | 0.503     | this study | 0.0110     | 15          | (3)    |
| Sn | 1.55      | 2.1         | (25)       | 0.921     | 0.685     | 0.301     | (25)       | 0.140      | 30          | (1)    |
| Se | 20.6      | 0.75        | this study | 12.7      | 7.95      | 4.75      | this study | 0.0800     | 21          | (3)    |
| S  | 51000     | 0.67        | this study | 30800     | 19800     | 10100     | this study | 211        | 19          | (3)    |
| Cd | 0.696     | 2.0         | (25)       | 0.422     | 0.265     | 0.138     | (25)       | 0.0310     | 19          | (14)   |
| Cl | 115       | 31          | (26)       | 151       | 85.0      | 70.0      | (26)       | 25.0       | 36          | (26)*  |
| Br | 0.189     | 38          | (26)       | 0.123     | 0.0500    | 0.100     | (26)       | 0.0740     | 35          | (26)*  |
| In | 0.0797    | 2.1         | (25)       | 0.0474    | 0.0290    | 0.0149    | (25)       | 0.0120     | 17          | (14)   |
| I  | 0.057     | 12          | (26)       | 0.0650    | 0.0350    | 0.0270    | (26)       | 0.0140     | 79          | (26)*  |
| Tl | 0.136     | 2.0         | (25)       | 0.0867    | 0.0593    | 0.0274    | (25)       | 0.00410    | 25          | (1)    |

483 \* average of compilation<sup>26</sup>

484

485

486 **Supplementary Table 2: Sulfur, Se and Te abundances [ $\mu\text{g/g}$ ] in different carbonaceous chondrites**  
 487 **determined by isotope dilution.**

| Sample         | Group | S     | 2sd | Se    | 2sd  | Te    | 2sd   | Source                              |
|----------------|-------|-------|-----|-------|------|-------|-------|-------------------------------------|
| Orgueil        | CI    | 45300 | 680 | 21.41 | 0.32 | 2.285 | 0.055 | A. Bischoff, Univ. Münster, Germany |
| Ivuna          | CI    | 51000 | 770 | 20.56 | 0.31 | 2.260 | 0.054 | J.-A. Barrat, UBO, France           |
| Y-980115       | CI    | 61270 | 920 | 24.15 | 0.36 | 2.405 | 0.058 | NIPR, Japan                         |
| SCO 06043      | CM1   | 32290 | 480 | 13.26 | 0.20 | 1.340 | 0.032 | MWG NASA, USA.                      |
| MET 01070      | CM1   | -     | -   | 13.55 | 0.20 | 1.430 | 0.034 | MWG NASA, USA                       |
| Paris          | CM2   | 32640 | 490 | 12.75 | 0.19 | 1.440 | 0.035 | J.-A. Barrat, UBO, France           |
| Murchison      | CM2   | 29170 | 440 | 12.50 | 0.19 | 1.372 | 0.033 | A. Bischoff, Univ. Münster, Germany |
| Mighei         | CM2   | 31940 | 480 | 13.06 | 0.20 | 1.455 | 0.035 | Field Museum, Chicago, USA          |
| Murray         | CM2   | 26060 | 390 | 12.47 | 0.19 | 1.440 | 0.035 | Smithsonian Institute, USA          |
| Cold Bokkeveld | CM2   | 27500 | 410 | 12.25 | 0.18 | 1.435 | 0.035 | NHM London, GB.                     |
| Nogoya         | CM2   | 31490 | 470 | 11.15 | 0.17 | 1.260 | 0.030 | MfN Berlin, Germany.                |
| Allende        | CV3   | 19750 | 300 | 8.51  | 0.13 | 0.922 | 0.022 | Smithsonian Institute, USA          |
| Vigarano       | CV3   | -     | -   | 7.40  | 0.11 | 0.860 | 0.021 | J. Schlüter, Univ. Hamburg          |
| Acfer 187      | CR2   | -     | -   | 5.04  | 0.08 | 0.539 | 0.013 | A. Bischoff, Univ. Münster, Germany |
| GRA 95229      | CR2   | 10140 | 150 | 4.45  | 0.07 | 0.458 | 0.011 | MWG NASA, USA                       |
| LAP 02342      | CR2   | 10060 | 150 | 5.06  | 0.08 | 0.498 | 0.012 | MWG NASA, USA                       |

488 The 2 sd intermediate precision was estimated from the 2RSD from repeated analyses and digestions of Murchison

489 CM2 (see text).

490
